# Supplementary material for: Relationship between Treatment Plan Dosimetry, Toxicity, and Survival following Intensity-Modulated Radiotherapy, with or without Chemotherapy, for Stage III Inoperable Non-Small Cell Lung Cancer
Source: MDPI journal article supplement (doi:10.3390/cancers13235923), 2021-11-25
Supplement: s1 [file s1]

**Table S1.** Overview of toxicities reported in other studies.

| REF                                                           | CTCAE version  | CCRT               | CCRT + IMT         | SCRT          | Radical RT |
|---------------------------------------------------------------|----------------|--------------------|--------------------|---------------|------------|
| <b>Pneumonitis <math>\geq 2</math></b>                        |                |                    |                    |               |            |
| Our analysis                                                  | 5.0            | 25.0%              |                    | 17% (scrt/rt) |            |
| <a href="#">Palma, IJROBP, 2013- Meta-analysis</a>            | -              | 29.8%              |                    |               |            |
| <a href="#">Liang, Ann Oncol, 2017</a>                        | -              | 18.9–33.3%         |                    |               |            |
| <a href="#">Wang, Lung Cancer, 2012</a>                       | Nci ctc<br>2.0 | 25%                |                    |               |            |
| <b>Pneumonitis grade 2</b>                                    |                |                    |                    |               |            |
| Our analysis                                                  | 5.0            | 23%                |                    | 14% (scrt/rt) |            |
| <b>Phase II trials</b>                                        |                |                    |                    |               |            |
| <a href="#">Wang, Lung Cancer, 2012</a>                       | Nci ctc<br>2.0 | 18.1%              |                    |               |            |
| <b>Phase III trials</b>                                       |                |                    |                    |               |            |
| <a href="#">RTOG 0617, Lancet Oncol, 2015</a>                 | 3.0            | 4%                 |                    |               |            |
| <b>“Real world”</b>                                           |                |                    |                    |               |            |
| <a href="#">Naidoo, JCO, 2017.</a> Different types of cancers | 4.0            |                    |                    |               |            |
| <b>Pneumonitis grade <math>\geq 3</math></b>                  |                |                    |                    |               |            |
| Our analysis                                                  | 5.0            | 2%                 |                    | 3% (scrt/rt)  |            |
| <b>Phase II trials</b>                                        |                |                    |                    |               |            |
| <a href="#">ETOP NICOLAS trial, Lung Cancer, 2019</a>         |                |                    | 0%                 |               |            |
| <a href="#">PET boost trial, Radiother Oncol, 2019</a>        | 3.0            | 0%                 |                    | 6.7%          |            |
| <a href="#">Wang, Lung Cancer, 2012</a>                       | Nci ctc<br>2.0 | 6.1%               |                    |               |            |
| <b>Phase III Trials</b>                                       |                |                    |                    |               |            |
| <a href="#">Antonia, NEJM, 2017</a>                           | ?              | 3.8%<br>(1.3% Gr5) | 4.2%<br>(0.8% Gr5) |               |            |

|                                                                |                |            |               |
|----------------------------------------------------------------|----------------|------------|---------------|
| <a href="#">RTOG-9410, J Natl Cancer Inst, 2011</a>            |                |            |               |
| Acute                                                          |                | 2.1–3.6%   | 8.7%          |
| Late                                                           |                | 12.5–14.0% | 14.8%         |
| <a href="#">EORTC 08972-22973, Eur J Cancer, 2007</a>          |                |            |               |
|                                                                |                | 18%        | 14%           |
| <a href="#">NPC 95-01, J Clin Oncol, 2005</a>                  |                |            |               |
|                                                                |                | 5%         | 11%           |
| <a href="#">RTOG 0617, Lancet Oncol, 2015</a>                  |                |            |               |
|                                                                | 3.0            | 4.7%       |               |
| <a href="#">ICOG0301, Lancet Oncol, 2012</a>                   |                |            |               |
|                                                                |                | 1.0%       | 3.1%          |
| <b>“Real world”</b>                                            |                |            |               |
| <a href="#">Wiersma, Lung Cancer, 2013</a>                     |                |            |               |
|                                                                | 4.03           | 4.1%       |               |
| <a href="#">Phernambucq, Ann Oncol, 2010</a>                   |                |            |               |
|                                                                |                | 7.9%       |               |
| <a href="#">Naidoo, JCO, 2017</a> . Different types of cancers |                |            |               |
|                                                                | 4.0            |            |               |
| <a href="#">Dieleman, IJROBP, 2018</a>                         |                |            |               |
|                                                                | 4.0            | 1.3%       |               |
| <a href="#">Kim, Radiat Oncol J, 2019</a>                      |                |            |               |
|                                                                | 4.0            | 18.5%      | 14.3%         |
| <a href="#">Jeremic, IJROBP, 2012</a>                          |                |            |               |
|                                                                |                | 12.1%      | 5.5%          |
| <b>Esophagitis grade ≥2</b>                                    |                |            |               |
| Our analysis                                                   |                |            |               |
|                                                                | 5.0            | 40.0%      | 48% (scrt/rt) |
| <a href="#">Kim, Radiat Oncol J, 2019</a>                      |                |            |               |
|                                                                | 4.0            | 44.4%      | 17.9%         |
| <a href="#">Wang, Lung Cancer, 2012</a> (Ph II)                |                |            |               |
|                                                                | Nci ctc<br>2.0 | 37.5%      |               |
| <b>Esophagitis grade 2</b>                                     |                |            |               |
| Our analysis                                                   |                |            |               |
|                                                                | 5.0            | 23%        | 37% (scrt/rt) |
| <a href="#">Palma, IJROBP, 2013- Meta-analysis</a>             |                |            |               |
|                                                                |                | 32.2%      |               |
| <b>Phase III trials</b>                                        |                |            |               |
| <a href="#">RTOG 0617, Lancet Oncol, 2015</a>                  |                |            |               |
|                                                                | 3.0            | 23–24%     |               |
| <b>“Real world”</b>                                            |                |            |               |
| <b>Dysphagia/Esophagitis grade ≥3</b>                          |                |            |               |
| Our analysis                                                   |                |            |               |
|                                                                | 5.0            | 17%        | 11% (scrt/rt) |

|                                                        |      |           |               |
|--------------------------------------------------------|------|-----------|---------------|
| <a href="#">Palma, IJROBP, 2013- Meta-analysis</a>     |      | 18.0%     |               |
| <b>Phase II Trials</b>                                 |      |           |               |
| <a href="#">PET boost trial, Radiother Oncol, 2019</a> | 3.0  | 14.3%     | 3.3%          |
| <b>Phase III trials</b>                                |      |           |               |
| <a href="#">EORTC 08972-22973, Eur J Cancer, 2007</a>  |      | 14%       | 5%            |
| <a href="#">RTOG-9410, J Natl Cancer Inst, 2011</a>    |      | 22–45%    | 4%            |
| <a href="#">NPC 95-01, J Clin Oncol, 2005</a>          |      | 32%       | 3%            |
| <a href="#">Blanke, J Clin Oncol, 1995</a>             |      | 3%        |               |
| <a href="#">RTOG 0617, Lancet Oncol, 2015</a>          | 3.0  | 3–7%      |               |
| <a href="#">Liang, Ann Oncol, 2017</a>                 |      | 6.3–20.0% |               |
| <b>“Real world”</b>                                    |      |           |               |
| <a href="#">Wiersma, Lung Cancer, 2013</a>             | 4.03 | 33.9%     |               |
| <a href="#">Phernambucq, Ann Oncol, 2010</a>           |      | 28.1%     |               |
| <a href="#">Dieleman, IJROBP, 2018</a>                 | 4.0  | 8.4%      |               |
| <a href="#">Jeremic, IJROBP, 2012</a>                  |      | 10.6%     | 4.7%          |
| <b>Cardiac events</b>                                  |      |           |               |
| Our analysis                                           | 5.0  | 8%        | 17% (scrt/rt) |
| <b>Phase II trials</b>                                 |      |           |               |
| <a href="#">PET boost trial, Radiother Oncol, 2019</a> | 3.0  | 6.5% (≥3) | 3.3% (≥3)     |
| <b>Phase III trials</b>                                |      |           |               |
| <a href="#">RTOG 0617, Lancet Oncol, 2015</a>          | 3.0  | 11%       |               |
| <b>“Real world”</b>                                    |      |           |               |
| <a href="#">Dess, JCO, 2017. St II-III</a>             |      |           |               |
| <a href="#">Dieleman, IJROBP, 2018</a>                 | 4.0  | 2.6% (≥3) |               |
| <a href="#">Jeremic, IJROBP, 2012</a>                  | -    | 0.2% (≥3) | 0%            |

**Table S2.** Univariate analysis for progression free survival.

PTV per 100cc increase; Mean lung dose per 100 cGy increase; V25Gy/V40Gy/V60Gy heart per 10% increase; V5Gy contralateral lung per 10% increase;

|                                    | cCRT |           |         | sCRT/RT |           |         |
|------------------------------------|------|-----------|---------|---------|-----------|---------|
|                                    | HR   | 95% CI    | p-value | HR      | 95% CI    | P-value |
| V25Gy heart (%)                    | 1.14 | 0.94–1.38 | 0.19    | 0.91    | 0.76–1.08 | 0.27    |
| V40Gy heart (%)                    | 1.20 | 0.97–1.49 | 0.10    | 0.87    | 0.70–1.08 | 0.20    |
| V60Gy heart (%)                    | 1.35 | 0.96–1.88 | 0.08    | 0.89    | 0.63–1.17 | 0.34    |
| Mean heart dose (cGy)              | 1.02 | 0.99–1.11 | 0.12    | 0.98    | 0.95–1.00 | 0.27    |
| V20Gy lungs (%)                    | 1.19 | 0.70–2.04 | 0.52    | 1.20    | 0.87–1.64 | 0.27    |
| V25Gy lungs (%)                    | 1.17 | 0.67–2.06 | 0.59    | 1.20    | 0.85–1.69 | 0.30    |
| V5Gy contralateral lung (%)        | 1.20 | 1.00–1.44 | 0.06    | 1.08    | 0.89–1.31 | 0.43    |
| Mean lung dose (cGy)               | 1.03 | 0.94–1.11 | 0.49    | 1.02    | 0.97–1.11 | 0.40    |
| V20Gy esophagus (cm <sup>3</sup> ) | 1.01 | 0.99–1.04 | 0.26    | 1.00    | 0.97–1.02 | 0.72    |
| V40Gy esophagus (cm <sup>3</sup> ) | 1.02 | 0.99–1.05 | 0.14    | 1.00    | 0.97–1.02 | 0.77    |
| V50Gy esophagus (cm <sup>3</sup> ) | 1.03 | 1.00–1.06 | 0.06    | 0.99    | 0.97–1.02 | 0.68    |
| V60Gy esophagus (cm <sup>3</sup> ) | 1.03 | 0.99–1.07 | 0.21    | 0.99    | 0.96–1.03 | 0.71    |
| N-stage 2                          | 0.65 | 0.22–1.92 | 0.44    | 0.88    | 0.26–30.4 | 0.84    |
| N-stage 3                          | 0.86 | 0.27–2.72 | 0.80    | 1.01    | 0.28–3.59 | 0.99    |
| Technique full VMAT                | 0.95 | 0.46–1.95 | 0.87    | 0.97    | 0.52–1.82 | 0.93    |
| Age                                | 1.02 | 0.98–1.06 | 0.25    | 1.02    | 0.99–1.04 | 0.23    |
| Smoking history                    | 1.01 | 1.00–1.02 | 0.15    | 1.01    | 1.00–1.02 | 0.16    |
| PTV volume                         | 1.18 | 1.11–1.35 | 0.01    | 0.98    | 0.91–1.11 | 0.57    |

Abbreviations: V25Gy/V40Gy/V60Gy heart: percentage of the heart that received at least 25/40/60Gy; V20Gy/V20Gy lungs: percentage of the total lung minus PTV that received at least 20/40/50Gy; V5Gy contralateral lung: percentage of the contralateral lung that received at least 5 Gy; V20Gy/V40Gy/V50Gy/V60Gy esophagus: volume (cm<sup>3</sup>) of the esophagus received at least 20/40/50/60 Gy; PTV: planning target volume; WHO: world health organization Radiotherapy; technique: full volumetric modulated arc therapy.

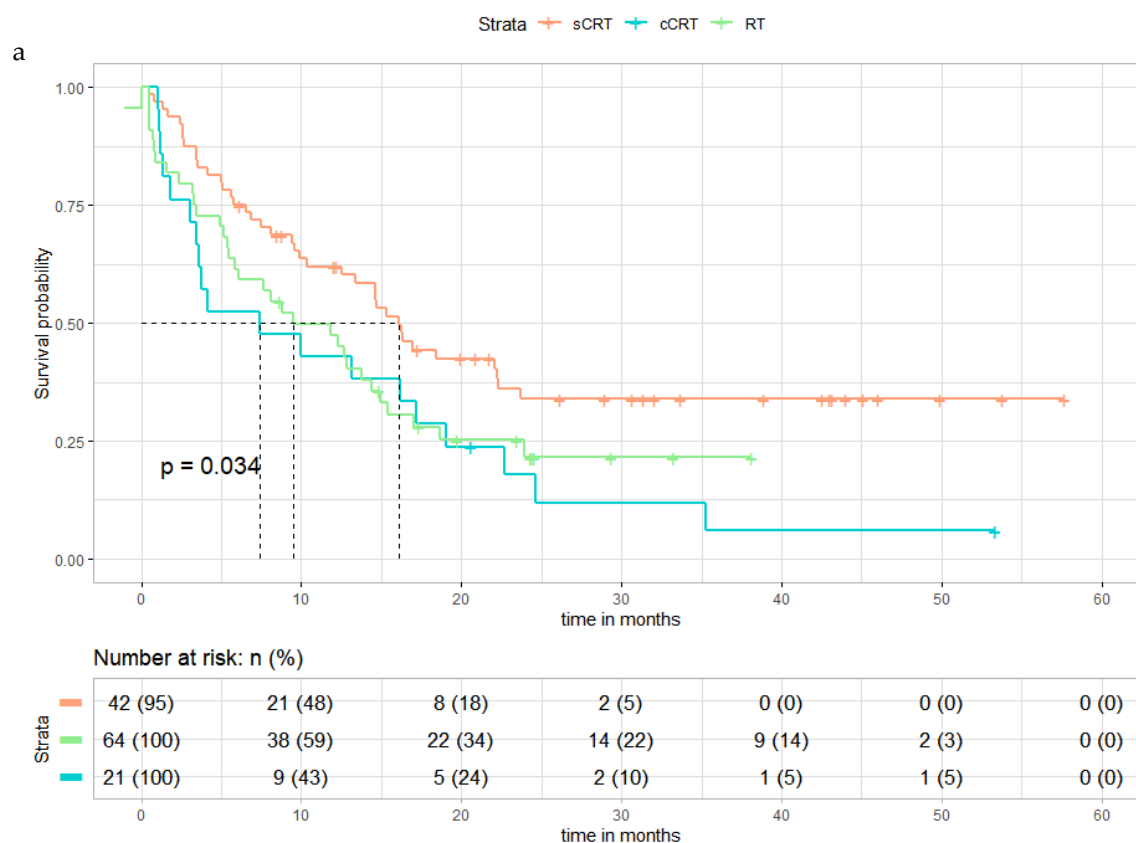

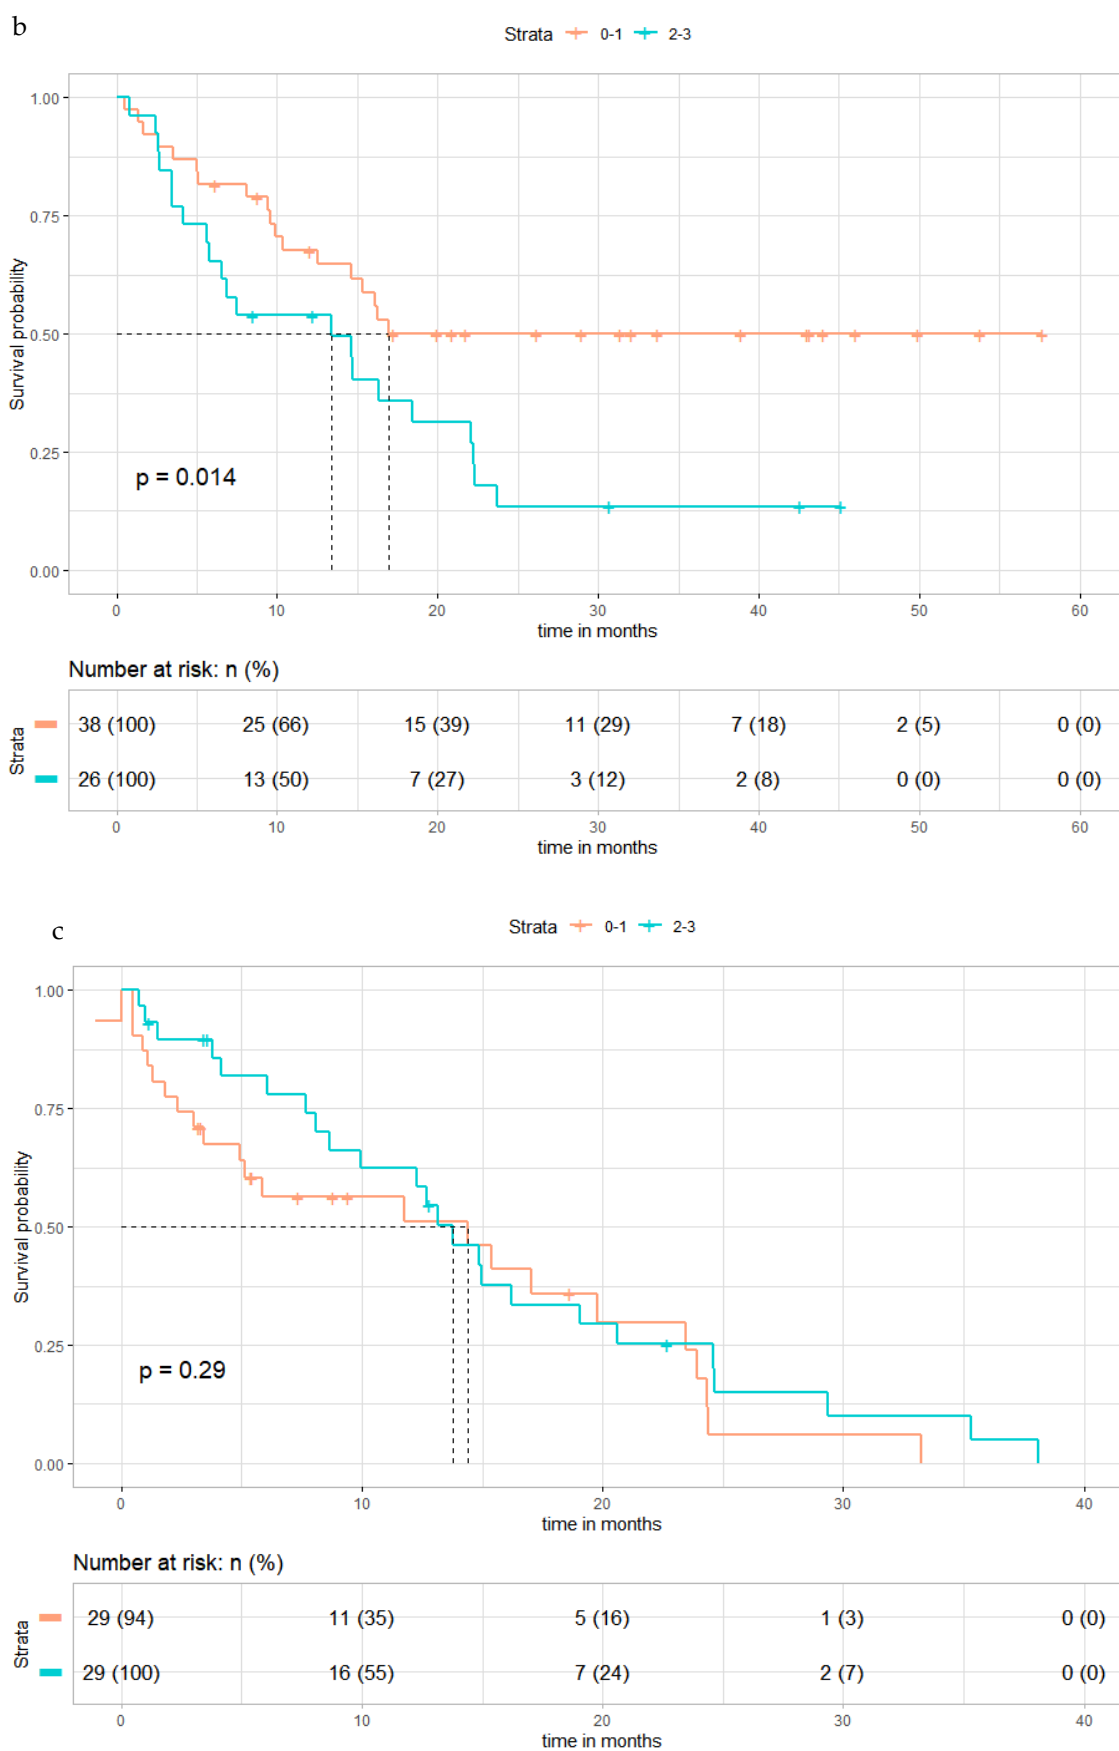

**Figure S1.** (a) Kaplan-Meier curves for progression free survival (PFS) for cCRT, sCRT and RT, (b) Kaplan-Meier PFS curves for patients with esophagitis grade 0–1 and grade 2–3, for cCRT only, (c) for sCRT/RT.
